# Supplementary material
Source: MDPI journal article supplement (https://www.mdpi.com/2306-5710/7/2/24)
Supplement: s1 [file s1]

## Supplementary Materials

# The Use of Temporal Check-All-That-Apply and Category Scaling by Experienced Panellists to Evaluate Sweet and Dry Ciders

Rachael Moss, Sophie Barker and Matthew B. McSweeney \*

Table S1. Attributes evaluated by the experienced panellists.

| Attribute    | Definition                                                                                  |
|--------------|---------------------------------------------------------------------------------------------|
| Clarity      | Appearance, from transparent to opaque.                                                     |
| Carbonation  | The effervescence of the beverage including the persistence of the bubbles and foam height. |
| Floral       | The aroma of elderflowers.                                                                  |
| Fresh Apple  | Aroma associated with fresh chopped apples or apple juice.                                  |
| Cooked Apple | Aroma associated with baking apples.                                                        |
| Citrus       | Aroma associated with grapefruit and lemon.                                                 |
| Banana       | Aroma associated with peeled bananas.                                                       |
| Yeasty       | Aroma associated with baker's yeast.                                                        |
| Chemical     | Aroma associated with nail polish.                                                          |
| Earthy       | Aroma associated with soil or freshly chopped mushrooms.                                    |
| Perfume      | Aroma associated with artificial floral and fruity aroma.                                   |
| Mouldy       | Aroma associated with a basement or cellar.                                                 |
| Sweet        | The taste stimulated by sucrose and other sugars.                                           |
| Sour         | The taste stimulated by citric acid.                                                        |
| Bitter       | The taste stimulated by caffeine.                                                           |
| Salty        | The taste stimulated by sodium salts.                                                       |
| Astringency  | Drying-out effect of your tongue and mouth from drinking black tea.                         |
| Acidic       | Similar to sour, green apples.                                                              |
| Tannic       | Derived from grape skins and seeds.                                                         |
